1 **A shared core microbiome in soda lakes separated by large distances**

2

3 **Running title: Shared core microbiome in distant soda lakes**

4

5 Jackie K. Zorz<sup>1§</sup>, Christine Sharp<sup>2</sup>, Manuel Kleiner<sup>3</sup>, Paul M.K. Gordon<sup>4</sup>, Richard T. Pon<sup>4</sup>, Xiaoli  
6 Dong<sup>1</sup>, Marc Strous<sup>1</sup>

7

8

9 <sup>1</sup>Department of Geoscience, University of Calgary, Calgary, AB, Canada

10 <sup>2</sup>University of Calgary

11 <sup>3</sup>Department of Plant and Microbial Biology, North Carolina State University, Raleigh, North  
12 Carolina, USA

13 <sup>4</sup>Centre for Health Genomics and Informatics, University of Calgary, Calgary, AB, Canada

14

15 §corresponding author

16 Email address:

17 jacqueline.zorz@ucalgary.ca

18

19

20

21 **Abstract (220 words)**

22 In alkaline soda lakes, high concentrations of dissolved carbonates establish an environment  
23 favouring productive phototrophic microbial mat communities. Here we show how different  
24 species of microbial phototrophs and autotrophs contribute to this exceptional productivity.  
25 Four years of amplicon and shotgun DNA sequencing data from microbial mats from four  
26 different lakes indicated the presence of over 2,000 different species of Bacteria and Eukaryotes.  
27 Metagenome-assembled-genomes were obtained for a core microbiome of <100 abundant  
28 bacteria, which was shared among lakes and accounted for half of the extracted DNA  
29 throughout the four year sampling period. Most of the associated species were related to  
30 similar microbes previously detected in sediments of Central Asian alkaline soda lakes,  
31 showing that common selection principles drive community assembly from a globally  
32 distributed reservoir of alkaliphile biodiversity. Dispersal events between the two distant lake  
33 systems were shown to be extremely rare, with dispersal rates a function of abundance in  
34 microbial mats, but not sediments. Detection of more than 7,000 expressed proteins showed  
35 how phototrophic populations allocated resources to specific processes and occupied  
36 complementary niches. Carbon fixation only proceeded by the Calvin-Benson-Bassham cycle,  
37 detected in Cyanobacteria, Alphaproteobacteria, and, suprisingly, Gemmatomonadetes. Our  
38 study not only provides new fundamental insight into soda lake ecology, but also provides a  
39 template, guiding future efforts to engineer robust and productive biotechnology for carbon  
40 dioxide conversion.

41

42

### 43 **Importance (150 words)**

44 Alkaline soda lakes are among the most productive ecosystems worldwide, despite their high  
45 pH. This high productivity leads to growth of thick “mats” of filamentous cyanobacteria. Here,  
46 we show that such mats have very high biodiversity, but at the same time contain a core,  
47 shared set of only approximately 100 different bacteria that perform key functions, such as  
48 photosynthesis. This “core microbiome” occurs both in Canadian and Central Asian soda lakes,  
49 >8,000 km apart. We present evidence for (very rare) dispersion of some core microbiome  
50 members from Canadian mats to Central Asian soda lake sediments. The close similarity  
51 between distant microbial communities indicates that these communities share common design  
52 principles, that reproducibly lead to a high and robust productivity. We unravel a few examples  
53 of such principles and speculate that these might be applied to create robust biotechnology for  
54 carbon dioxide conversion, to mitigate of global climate change.

55

### 56 **Introduction**

57 Soda lakes are among the most alkaline natural environments on earth, as well as among the  
58 most productive aquatic ecosystems known (1,2). The high productivity of soda lakes is due to  
59 a high bicarbonate concentration. Tens to hundreds of millimolars of bicarbonate are typically  
60 available for photosynthesis using carbon concentrating mechanisms (3,4), compared to  
61 generally < 2 mM in the oceans (5). This can lead to the formation of thick, macroscopic  
62 microbial mats with rich microbial biodiversity (6). Because of the high pH, alkalinity, and high  
63 sodium salinity of these environments, the microorganisms that reside in soda lakes are  
64 considered extremophiles (7). Using conditions of high pH and alkalinity is also a promising

65 option to improve the cost-effectiveness of biotechnology for biological carbon dioxide capture  
66 and conversion (8-10).

67 Soda lakes have contributed to global primary productivity on a massive scale in  
68 Earth's geological past (11). Currently, groups of much smaller soda lakes exist, for example, in  
69 the East African Rift Zone, rain-shadowed regions of California and Nevada, and the Kulunda  
70 steppe in South Russia (12). Many microorganisms have been isolated from these lakes. These  
71 include cyanobacteria (13-15), chemolithoautotrophic sulfide oxidizing bacteria (16-18), sulfate  
72 reducers (19,20), nitrifying (21-22) and denitrifying bacteria (23), as well as aerobic  
73 heterotrophic bacteria (24-25), methanotrophs (26), fermentative bacteria (27-28), and  
74 methanogens (29). Recently, almost one thousand Metagenome Assembled whole Genome  
75 sequences (MAGs) were obtained from sediments of Kulunda soda lakes (30).

76 In the present study we investigate the microbial mat community structure of four  
77 alkaline soda lakes located on the Cariboo Plateau in British Columbia, Canada. This region has  
78 noteworthy geology and biology due to the diversity in lake brine compositions within a  
79 relatively small region (31). There are several hundred shallow lakes on the Cariboo Plateau  
80 and these range in size, alkalinity, and salinity. Underlying basalt in some areas of the plateau,  
81 originating from volcanic activity during the Miocene and Pliocene eras, provides ideal  
82 conditions for forming soda lakes, as these areas are poor in calcium and magnesium (6,32,33).  
83 Some of these lakes harbor seasonal microbial mats that are either dominated by cyanobacteria  
84 or eukaryotic green algae. However, beyond this little is currently known about these systems  
85 in terms of microbiology.

86 We used a combination of shotgun metagenomes, and 16S and 18S rRNA amplicon  
87 sequencing to establish a microbial community structure for the microbial mats of four soda

88 lakes. Next, we performed proteomics to show how specific populations allocate resources to  
89 specific metabolic pathways, focusing on photosynthesis, and carbon, nitrogen, and sulfur  
90 cycles. Overall, this study provides a comprehensive molecular characterization of a  
91 phototrophic microbial mat microbiome and shows how this highly productive ecosystem is  
92 supported by a set of complementary niches among phototrophs.

93

## 94 **Results and Discussion**

95 The Cariboo Plateau contains hundreds of lakes of different size, alkalinity and salinity. Here  
96 we focused on four alkaline soda lakes (**Figure 1**) that feature calcifying microbial mats with  
97 similarities to ancient stromatolites or thrombolites (6,34,35). Between 2014 and 2017, the total  
98 alkalinity in these lakes was between 0.20-0.65 mol/L at pH 10.1-10.7 (**Supplementary Table**  
99 **1**). Four years of amplicon sequencing data (16S and 18S rRNA) showed the microbial mats to  
100 be diverse communities, with 1,662 bacterial and 587 eukaryotic species-level operational  
101 taxonomic units (OTUs) identified, overall (**Supplementary Table 2**). The mat communities  
102 from different lakes were similar, but distinct, and relatively stable over time (**Figure 1**). Probe,  
103 Deer and Goodenough Lakes harbored predominantly cyanobacterial mats, whereas the mats  
104 of more saline Last Chance Lake contained mainly phototrophic Eukaryotes. This was shown  
105 with proteomics (see below), because it was impossible to compare abundances of Eukaryotes  
106 and Bacteria using amplicon sequencing. Bacterial species associated with 340 OTUs were  
107 found in all four lakes. These species accounted for 20.5% of the region's species richness and  
108 84% of the total sequenced reads, suggesting that there is a common and abundant "core"  
109 microbiome shared among the alkaline lakes of the Cariboo Plateau.

# Figure 1

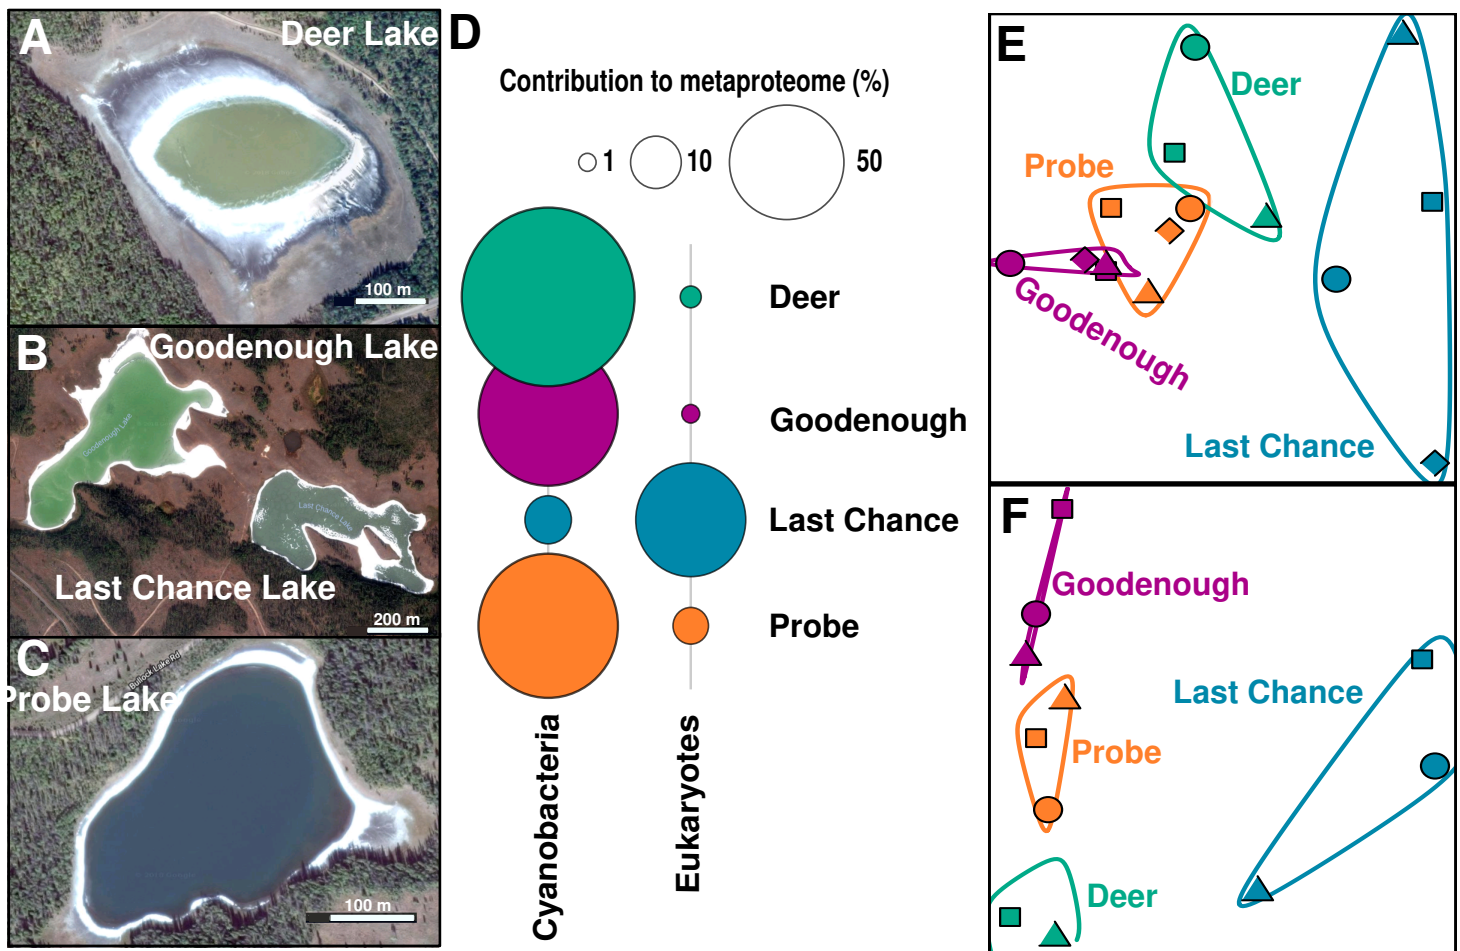

Figure 1 – Satellite images of **A** Deer Lake, **B** Goodenough and Last Chance Lakes, **C** Probe Lake. **D**. Bubble plots showing the relative contribution of Cyanobacteria and Eukaryotes to the lake metaproteomes. **E**. Non-metric multidimensional scaling (NMDS) plots using Bray-Curtis dissimilarity to visualize the microbial communities of the soda lake mats over years of sampling using 16S rRNA amplicon sequencing data, and **F**. 18S rRNA amplicon sequencing data. Shapes indicate year of sampling: Circles: 2014, square: 2015, diamond: 2016, triangle: 2017. Samples for 18S rRNA analysis were not taken in 2016, and Deer Lake samples were not taken in 2014 for 18S, and +2016 for 16S. NMDS Stress values were below 0.11.

110 After amplicon sequencing had outlined the core microbiome of the Cariboo soda lake  
111 microbial mats, shotgun metagenome sequencing, assembly and binning were used to obtain  
112 the provisional whole genome sequences, or metagenome-assembled genomes (MAGs), of its  
113 key microbiota. We selected 91 representative, de-replicated, near-complete (>90% for 85  
114 MAGs), relatively uncontaminated (<5%, for 83 MAGs) for further analysis (**Supplementary**  
115 **Table 3**). For fifty-six MAGs, we independently assembled and binned 2-5 nearly identical  
116 (>95% average nucleotide identity) versions, indicating the presence of multiple closely related  
117 strains. 40-60% of quality-controlled reads were mapped to the 91 MAGs, showing that the  
118 associated bacteria accounted for approximately half of the DNA extracted. Most of the  
119 remaining reads were mapped to MAGs of lower quality and coverage, associated with a much  
120 larger group of less abundant bacteria. This was not surprising because amplicon sequencing  
121 had already indicated the presence of >2,000 different bacterial and eukaryotic species. Full  
122 length 16S rRNA gene sequences (**Supplementary Table 4**) were reconstructed from shotgun  
123 metagenome reads. Fifty-seven of those could be associated with a MAG based on taxonomic  
124 classifications and abundance profiles. Perfect alignment of full length 16S rDNA gene  
125 sequences to consensus OTU amplicon sequences showed that almost all these MAGs were  
126 core Cariboo microbiome members, present in each lake.

127 **Figure 2** shows the taxonomic affiliation and average relative sequence abundances for  
128 the bacteria associated with the MAGs. For taxonomic classification we used the recently  
129 established GTDB taxonomy (36). We also used the GTDB toolkit to investigate the similarity  
130 of the Cariboo mat genomes to >800 MAGs recently obtained from sediments of the Central  
131 Asian soda lakes of the Kulunda Steppe (30). The distance between the two systems of alkaline  
132 lakes is approximately 8,000 km. Yet, fifty-six of the Cariboo MAGs were clustered together

## Figure 2

a.

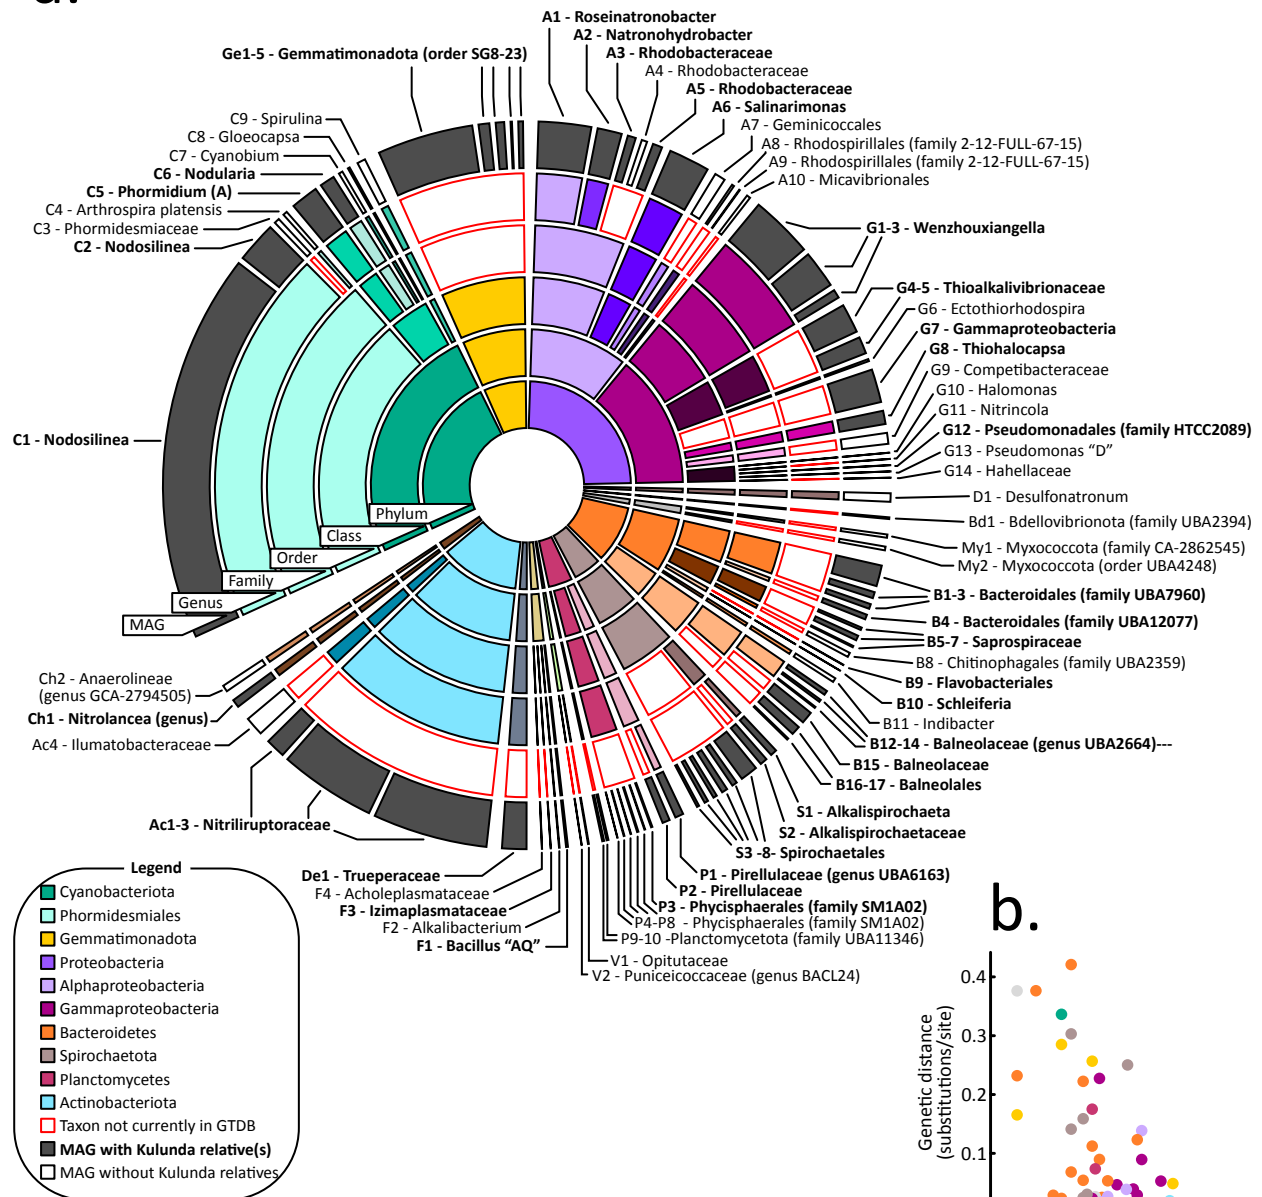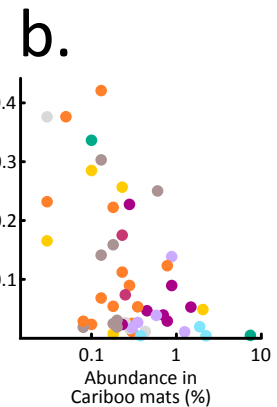

figure 2 – a. Sunburst diagram showing relative abundances and GTDB taxonomic classifications of metagenome-assembled-genomes (MAGs) obtained from Cariboo lakes. Core-microbiome MAGs with closest relatives among Central Asian (Kulunda) soda lake MAGs are shown in grey. Red outlines indicate new clades that were not yet represented in GTDB. For example, MAG C1, the most abundant MAG, is affiliated with the genus *Nodosilinea*, which was represented in GTDB, with a Kulunda MAG more similar than any genome present in GTDB. b. Scatter plot showing for each core microbiota the genetic distance between Cariboo and Kulunda representatives as a function of the abundance in Cariboo mat samples. This relationship is statistically significant (Pearson's correlation  $r: -0.49$ ,  $p < 0.05$ ), but no such relationship was detected for the abundance of Kulunda MAGs. See also Supplementary Table 3.



133 with Kulunda MAGs and defined new family or genus level diversity in the context of the  
134 GTDB database (release 86, >22,000 whole genome sequences). This degree of similarity  
135 between geographically distant lake systems was surprising, especially because DNA was  
136 obtained from Kulunda sediments, not mats. It suggests that the core microbiome defined here  
137 for Cariboo lake mats, also applies to at least one other, well described system of soda lakes.

138         Interestingly, the distance between the most similar MAGs from each of the two regions  
139 decreased with increasing abundance in Cariboo mats (Pearson correlation -0.49,  $p$  0.0003,  
140 **Figure 2b, Supplementary Table 3**), but not with abundance in Kulunda sediments. For  
141 example, the most abundant Cariboo cyanobacterium (**C1** – affiliated with *Nodosilinea*, relative  
142 abundance >7%) displayed 99% average nucleotide identity over 85% of its genome with  
143 Kulunda MAG GCA\_003550805. The latter displayed <0.1% relative abundance in Kulunda  
144 sediments. Mapping of Kulunda sequencing reads directly to Cariboo genomes  
145 (**Supplementary Table 3**) did not provide any evidence for the presence of previously  
146 undetected bacteria/MAGs in Kulunda sediments that were more similar to Cariboo  
147 bacteria/MAGs than those presented by Vavourakis et al. (2018).

148         These results suggest that when the Cariboo lakes formed ~10,000 years ago after the  
149 last ice age (6), their microbiomes assembled from a much older, global reservoir of alkaliphile  
150 biodiversity. The striking relationship between Cariboo abundance and Kulunda-Cariboo  
151 relatedness might be explained by increased rates of successful dispersal/colonization for more  
152 abundant populations. Identification of vectors for dispersal still awaits future research, but  
153 bird migration is an obvious candidate. For example, the Northern Wheatear, which migrates  
154 between Northern Canada and Africa via Central Asia, could potentially link many known

155 soda lakes worldwide. Abundance in sediments, located below mats, might not explain  
156 dispersal well, because sediments are less exposed to dispersal vectors than mats.

157         In any case, the genetic distances separating related bacteria were generally large,  
158 indicating that successful colonization by invading bacteria from a different lake system must  
159 be extremely rare. Possibly, only a single bacterium (MAG C1) traveled between and  
160 successfully colonized another lake system since the last ice age. A strong degree of isolation  
161 was also observed for other “ecological islands”, such as hot springs (37).

162 Thus, the observed similarities of the microbiota between distant lake systems indicate shared  
163 outcomes of community assembly for microbial mat microbiomes in two distant soda lake  
164 environments. Future studies will indicate whether the core microbiota of Kulunda and  
165 Cariboo soda lakes has also assembled in other soda lakes.

166         Dispersal between Cariboo soda lakes, separated by at most 40 km, was very effective.  
167 For all 56 sets of 2-5 nearly identical MAG variants (average nucleotide identity >95%) we  
168 detected co-occurrence of all variants (**Supplementary Table 5**). This also showed that  
169 competitive exclusion was irrelevant, even for these nearly identical bacteria. Comparison of  
170 ratios of synonymous and non-synonymous mutations among the most rapidly evolving core  
171 genes – genes present in all genome variants, **Supplementary Table 6** – showed that  
172 diversifying selection acted on 775 genes, including many transporters and genes involved in  
173 cell envelope biogenesis. Accessory genes – not encoded on all variant genomes – and CRISPRs  
174 could display many more ecologically relevant differences, which could prevent competitive  
175 exclusion.

176

177 The processes that dictate assembly of effective phototrophic microbial mat communities are  
178 well understood, with ecological adaptations and responses to dynamic light, oxygen, sulfide,  
179 pH and carbon dioxide gradients (38). But, to what extent do these known “rules of  
180 engagement” also apply to alkaline soda lake microbial mats, where primary productivity has  
181 access to unlimited inorganic carbon (2,6)? We performed environmental proteomics and  
182 connected protein expression to abundant MAGs to answer this question for the Cariboo  
183 Plateau soda lake mats (**Supplementary Table 7**).

184       Over seven thousand expressed proteins were identified, with high confidence, in  
185 daytime mat samples from each of the lakes. For comparison, the most comprehensive  
186 environmental proteomes obtained so far have identified up to approximately ten thousand  
187 proteins (39). Given the high diversity and extremely complex nature of the mat samples,  
188 identification of 7,217 proteins is an excellent starting point for ecophysiological interpretation.  
189 Approximately half of the expressed proteins could be attributed to the 91 MAGs, consistent  
190 with abundance estimates inferred from amplicon and shotgun data. This enabled us to  
191 investigate how the bacteria associated with the MAGs distributed their resources over  
192 different ecophysiological priorities (40). Given that a substantial amount of cellular energy  
193 goes towards manufacturing proteins, the relative proportion of a proteome dedicated to a  
194 particular function provides an estimate of how important that function is to the organism.  
195 Proteomic data were also used to estimate the  $^{13}\text{C}$  content of some abundant species, providing  
196 additional information on which carbon source they used and to what extent their growth was  
197 limited by carbon availability (Kleiner et al., 2018). Brady et al. (2013) previously showed that  
198 microbial mat organic matter had  $\delta^{13}\text{C}$  values of -19 to -25‰, up to 11.6‰ depleted in  $^{13}\text{C}$   
199 compared to bulk inorganic carbonates, consistent with non- $\text{CO}_2$ -limited photosynthesis.

200 Overall protein  $\delta^{13}\text{C}$  values for the four lakes inferred from the proteomics data in the present  
201 study were between -19 and -25‰, consistent with previous results for mat organic matter.

202 Consistent with their reputation as productive ecosystems with virtually unlimited  
203 access to inorganic carbon, the most abundant bacteria were large, mat-forming (filamentous)  
204 cyanobacteria, related to *Nodosilinea* and *Phormidium*. Pigment antenna proteins and  
205 photosynthetic reaction center proteins accounted for the largest fraction of detected proteins  
206 overall. The organism with the highest presence in the metaproteome was the cyanobacterial  
207 MAG C1, affiliated with *Nodosilinea* and accounting for up to 42% of mat metaproteomes.  
208 Remarkably, we were able to identify 1,103 proteins from this MAG, 27% of its predicted  
209 proteome (**Figure 3**). This level of detection is comparable to results of pure cultures of  
210 cyanobacteria, such as *Arthrospira*, 21%, and *Cyanothece*, 47% (41,42). Nine cyanobacterial  
211 MAGs were assembled in total, and proteins from all nine were detected in the metaproteomes  
212 of all four lakes (**Supplementary Table 7**). It is clear that the presence of so many  
213 cyanobacteria provides functional redundancy and contributes to functional robustness and  
214 resiliency (43,44). However, we also detected strong evidence for niche differentiation for those  
215 cyanobacteria with larger numbers of proteins detected, in particular MAG C1 (*Nodosilinea*),  
216 and MAG C5 (*Phormidium* “A”) (**Figure 4**).

217 Phycobilisomes, the large, proteinaceous, light harvesting complexes of cyanobacteria,  
218 contain an assortment of pigments which absorb at different wavelengths of light, and re-emit  
219 that light at longer wavelengths, around 680 nm, compatible with the reaction center of  
220 Photosystem II. Phycobilisome pigment composition varied among the cyanobacterial  
221 populations, leading to niche differentiation based on light quality, as was also observed in the  
222 marine environment (45). C1 and most other cyanobacterial populations expressed high

## Figure 3

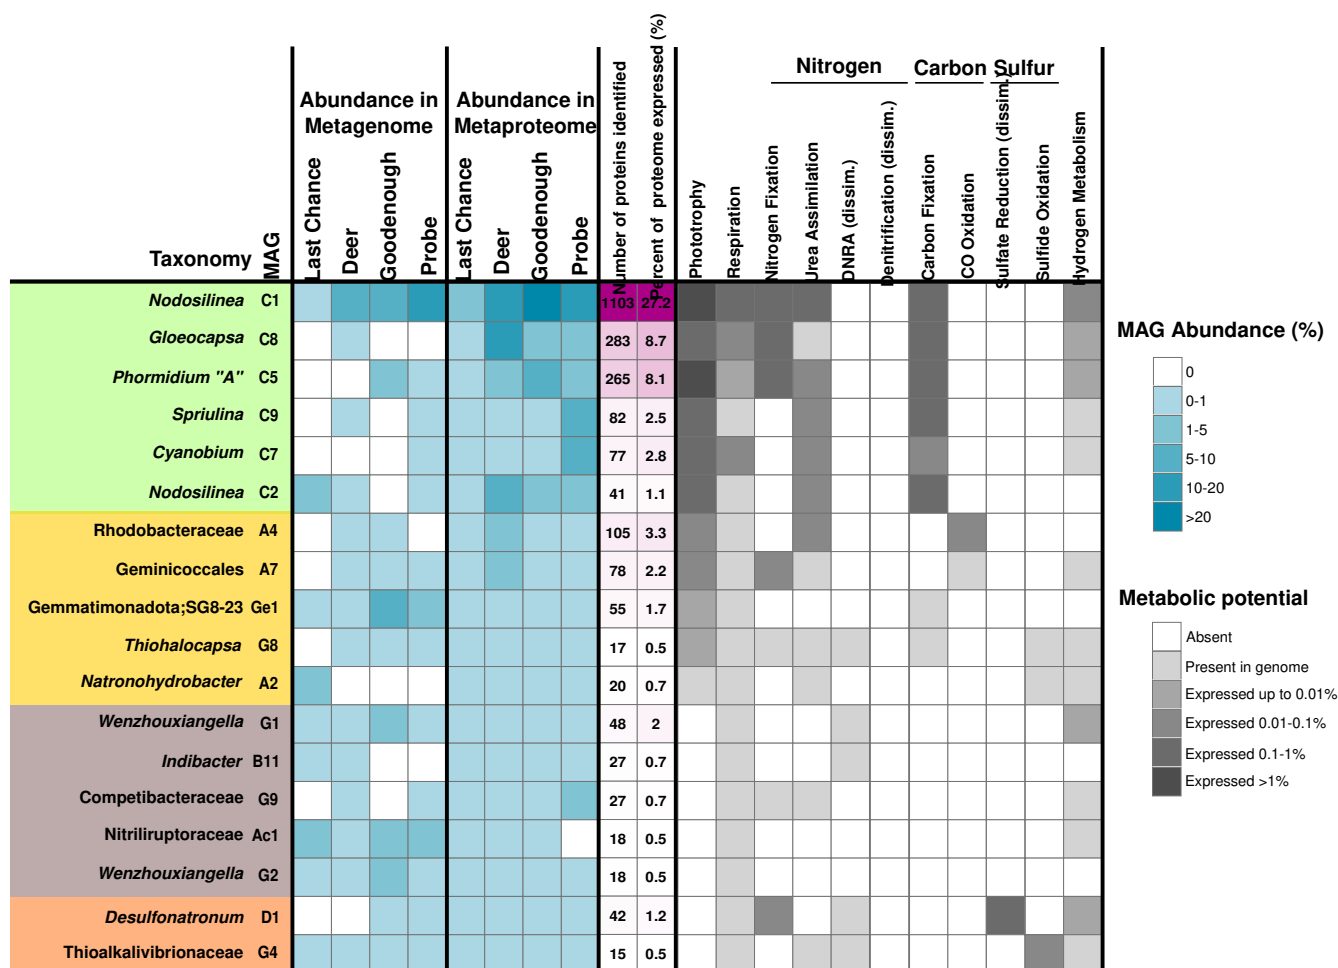

Figure 3 – Heatmap showing abundances and expressed functions for metagenome-assembled genomes (MAGs) with at least 15 proteins identified in the metaproteomes. MAGs are broadly arranged based on function, with photoautotrophs in green, anoxygenic phototrophs in yellow, sulfur cycling in orange, and other heterotrophic bacteria in brown. Metabolic potential was inferred from the genes listed in Supplementary Table 7. If the gene was identified in a metaproteome it was considered “expressed”, and is shaded according to its highest relative abundance (% of all peptide spectral matches) in the four lake metaproteomes.

## Figure 4

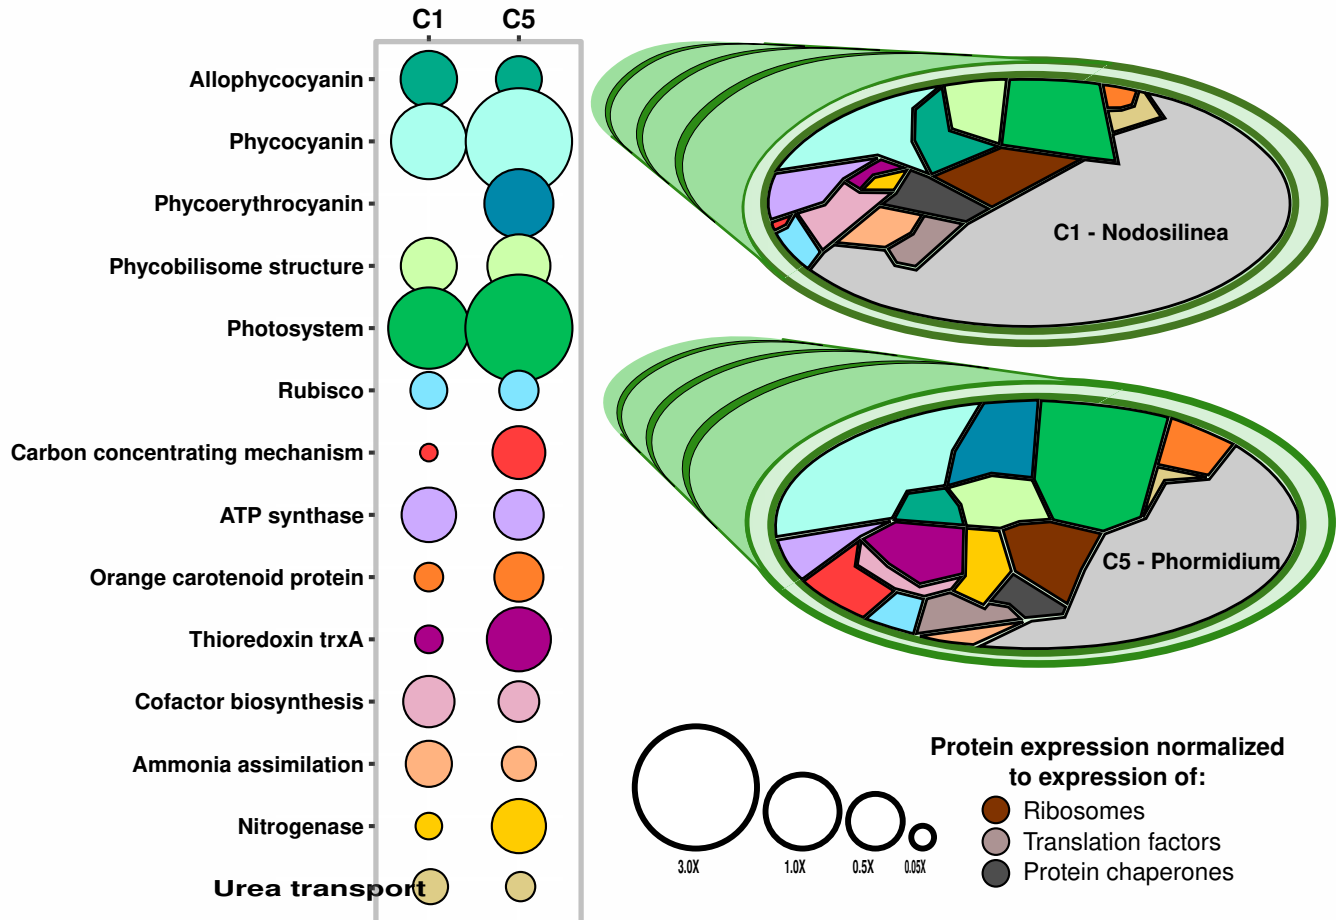

Figure 4 – Voronoi diagrams comparing expression levels of functions by MAGs **C1** and **C5**, both associated with filamentous cyanobacteria. The area of for each function is proportional to the percent that protein or subsystem accounts for out of the MAG’s expressed proteins. Size of the bubble in the bubble plot is normalized against the relative abundances of ribosomal proteins, translation factors, and protein chaperones in the MAG’s proteome. See also **Supplementary Table 7**.

223 amounts of phycocyanin, maximum absorbance 620 nm, and allophycocyanin, maximum  
224 absorbance 650 nm. In contrast, **C5** uniquely expressed the pigment phycoerythrocyanin, with  
225 a maximum absorbance at 575 nm (**Figure 4**). Phycoerythrocyanin would enable this  
226 population to absorb shorter wavelengths of light, in comparison to its cyanobacterial  
227 neighbours, and expands the “spectral reach” of photosynthesis for these mat communities,  
228 increasing productivity. The absence of expression of phycoerythrin, which has a maximum  
229 absorbance at 495 and 560 nm, is consistent with the light attenuation profile of aquatic  
230 environments with high dissolved organic matter, such as productive alkaline lakes, where  
231 wavelengths < 500 nm are rapidly attenuated (46,47).

232         Shorter wavelength light (blue/green light) has higher energy, and high energy photons  
233 can damage photosynthetic machinery in cyanobacteria. If **C5** would be exposed to these  
234 photons, as its pigment profile suggests, this could lead to more photodamage. Consistently,  
235 this population displayed higher expression of proteins like thioredoxin, for scavenging  
236 reactive oxygen species, and orange carotenoid protein for photoprotection (**Figure 4**).

237         Inorganic carbon fixation and acquisition are central to realizing high primary  
238 productivity and the associated enzymes were highly expressed. The rate-limiting, Calvin-  
239 Benson-Bassham Cycle (CBB) enzyme RuBisCO accounted for approximately 1% of the  
240 expressed proteomes of cyanobacterial MAGs, large fraction for a single enzyme (**Figure 4**). In  
241 contrast, the expression of the carbon concentrating mechanism (CCM, needed for bicarbonate  
242 uptake) varied greatly among cyanobacteria. In **C1** and **C8**, CCM proteins accounted for less  
243 than 0.2% of the proteomes. In **C5**, CCM proteins accounted for almost 3% of the expressed  
244 proteomes. **C5** was the only population to express CCM proteins to a greater level than  
245 RuBisCO proteins, suggesting that this population’s growth rate might be limited by

246 bicarbonate availability. Indeed, C5's  $\delta^{13}\text{C}$  value was  $-20.6 \pm 2.7\%$ , compared to  $-25.2 \pm 0.8\%$  for  
247 C1. A decrease in isotopic fractionation during photosynthesis is usually associated with  $\text{CO}_2$   
248 (or bicarbonate) limitation (48). We might conclude that C5's access to higher energy radiation  
249 leads to a higher rate of photosynthesis, increased oxygen production, a higher need for  
250 protection against free radicals, a higher growth rate against a limiting rate of bicarbonate  
251 supply. At a relative abundance of up to 2.3%, C5 was not the most abundant cyanobacterium,  
252 so if it had a higher growth rate, it must also have had a higher decay rate, which is typical for  
253 this organism appearing to be an ecological R strategist.

254 Nitrogen is a commonly limiting nutrient for primary production in soda lakes globally  
255 (49). The Cariboo Plateau lakes also display low or undetectable concentrations of ammonium  
256 and nitrate in lake waters (**Supplementary Table 1**). Consistently, no expression was detected  
257 for any proteins involved in nitrogen loss processes, such as nitrification or denitrification, or  
258 for assimilatory nitrate reductases or nitrate transporters.

259 Many bacteria, including the cyanobacteria C1, C5 and C8, expressed the key genes for  
260 the energetically expensive process of nitrogen fixation (**Supplementary Table 7**). All  
261 cyanobacteria further expressed glutamine synthetase, for the assimilation of ammonia under  
262 nitrogen limiting conditions (50), and the urea transporter. Dinitrogen, urea and, possibly,  
263 ammonia, were apparently the main nitrogen sources supporting photosynthesis. Parallel  
264 performance of nitrogen fixation by different bacteria provided functional redundancy,  
265 contributing to functional robustness and resiliency.

266 Phosphate can also be a limiting nutrient in soda lakes (49), and this appeared to be the  
267 case for Deer Lake in the present study, where phosphate was undetectable in lake waters  
268 (**Supplementary Table 1**). Cyanobacterium C8 (*Gloeocapsa*) was the most abundant



269 population in Deer Lake (12.9% of Deer Lake metaproteome), and expressed a high-affinity  
270 phosphate transport system at higher levels (1.5% of C8 expressed proteome) than the other  
271 cyanobacteria. Phosphate potentially limited primary production in Deer Lake, as anoxygenic  
272 photoheterotrophs were 4-40x more abundant here than in the other lakes (**Figure 3**,  
273 **Supplementary Tables 3** and 7).

274       The microbial mats of the Cariboo region display steep oxygen and sulfide gradients (6),  
275 providing opportunities for photoheterotrophic bacteria that use any remaining light, which  
276 penetrates beyond the oxic layer created by cyanobacteria (38,51). Photosystem proteins such  
277 as Puf or Puh were expressed by purple non-sulfur bacteria affiliated with Rhodobacteraceae,  
278 MAG **A4**, and Geminococcales, MAG **A7**, as well as autotrophic purple sulfur bacteria, affiliated  
279 with *Thiohalocapsa*, MAG **G8**. Both photoheterotrophs were relatively abundant in phosphate-  
280 limited Deer Lake, at 3.2% and 2.8% respectively. In addition to PuhA, MAG **A4** expressed all  
281 three subunits of carbon monoxide dehydrogenase (coxSML). Carbon monoxide could be  
282 produced by photooxidation of organic material (52), and could serve as an alternative energy  
283 source for these bacteria. Organic substrates supporting photoheterotrophic growth likely  
284 consist of cyanobacterial fermentation products, glycolate from photorespiration (38) or could  
285 originate from biomass decay. By re-assimilation of organic matter or re-fixation of bicarbonate  
286 using light energy, these organisms enhance the overall productivity of the mats.

287       Most unexpected among photoheterotrophs was population **Ge1**, a representative of an  
288 uncultured family within the recently defined phylum Gemmatimonadota. This particular  
289 population expressed the PufC subunit of the photosynthetic reaction center and contains the  
290 remaining photosystem genes in its genome (PufLMA, PuhA, AcsF). The ability for members of

291 this phylum to use light energy was only recently discovered (53), and the capacity for  
292 phototrophy appears to be widespread among members of that phylum (54).

293         The Gemmatimonadetes bacterium isolated by Zheng and colleagues is heterotrophic,  
294 without evidence for a carbon fixation pathway. Interestingly, MAG **Ge1** is in possession of all  
295 the genes required for a complete carbon-fixing CBB cycle. Genes homologous to the  
296 functional RuBisCO Form 1C large subunit (RbcL), RuBisCO small subunit (RbcS) were  
297 identified, as well as a copy of the CBB cycle-specific enzyme Phosphoribulokinase (PRK).  
298 These genes were arranged sequentially in the genome: RbcS, RbcL, and PRK, an arrangement  
299 that points at facultative autotrophy (55). Upon further investigation of the published MAGs  
300 from the Kulunda Steppe soda lakes in Central Asia, we found five additional  
301 Gemmatimonadetes MAGs (**Figure 5**), that encoded these three CBB cycle genes with the same  
302 synteny, and with 88-98% amino acid identity, to the genes of **Ge1**. All identified RbcL genes  
303 are functional Form 1C RbcL sequences (**Figure 5B**). To our knowledge these six MAGs  
304 contain the first examples of the full suite of CBB cycle genes in this phylum. Given the large  
305 number of amino acids (>90%) shared with homologous genes encoded in  
306 Alphaproteobacteria (e.g. Rhizobiales bacterium YIM 77505 RbcL), it seems likely that the last  
307 common ancestor of these Gemmatimonadetes populations acquired the CBB genes via  
308 horizontal gene transfer from an Alphaproteobacterium, prior to the dispersal and speciation of  
309 the clade into the Kulunda Steppe and Cariboo Plateau populations. We did not detect  
310 expression for these genes and were not able to estimate the  $\delta^{13}\text{C}$  value for this bacterium (too  
311 few high quality MS1 spectra) so it remains unknown to what extent this bacterium used  
312 bicarbonate as a carbon source.

## Figure 5

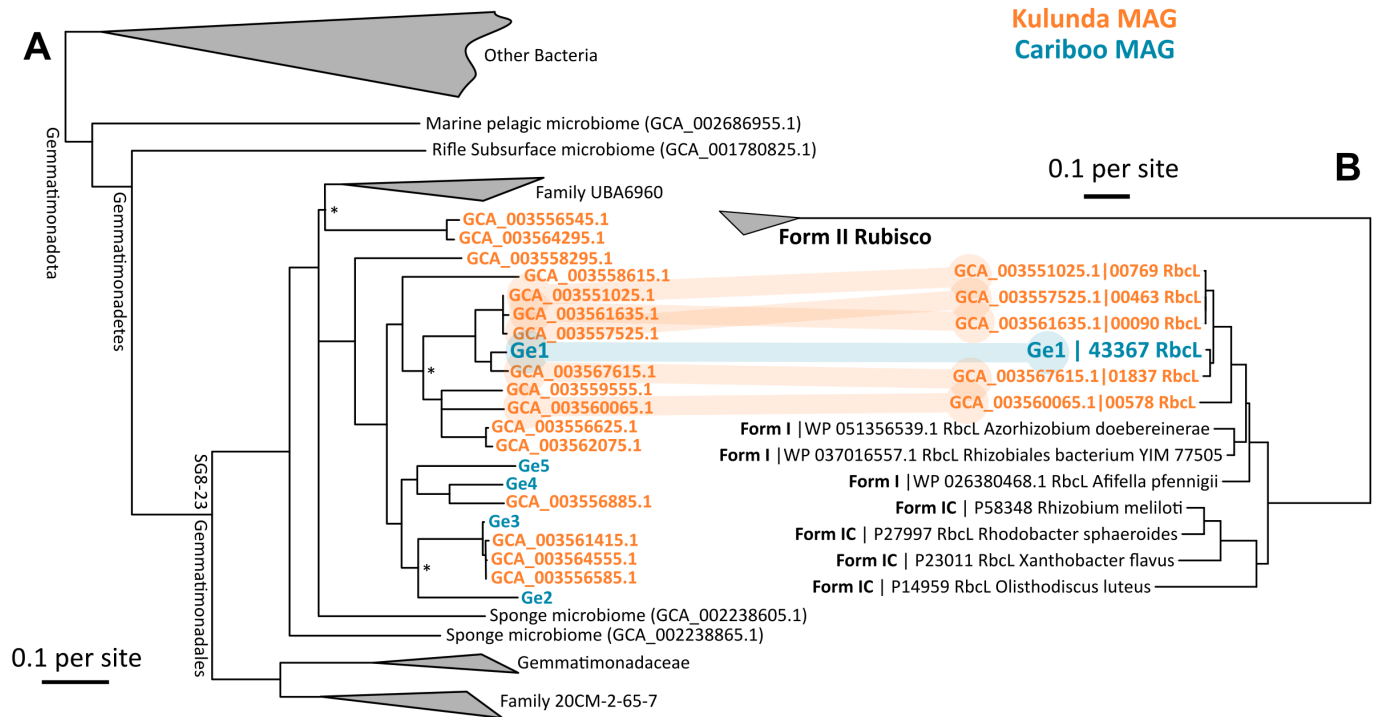

Figure 5 – **a.** Phylogenetic tree of MAGs affiliated with Gemmatimonadota obtained from Cariboo lakes (blue, **Ge1-5**) and Kulunda lakes (orange). The tree was created with GTDBtk, based on concatenated conserved single copy genes, using fasttree2. **b.** Phylogenetic tree of the RuBisCO Form I encoded on MAGs in one of the Gemmatimonadota clades. Congruence between the trees indicates vertical inheritance after a single horizontal gene transfer event from Alphaproteobacteria.

313           The presence of the autotrophic purple sulfur bacterium **G8**, affiliated with  
314 *Thiohalocapsa*, indicated active sulfur cycling within the mats, as expected based on sulfide  
315 gradients (Brady et al., 2013). Indeed, MAG **D1**, affiliated with *Desulfonatronum* (20,56)  
316 expressed *aprAB*, *sat*, and *dsrAB*. It also expressed an alcohol dehydrogenase, a formate  
317 dehydrogenase, and a hydrogenase, indicating that it oxidized compounds such as ethanol,  
318 formate, and hydrogen. These could be derived from dark fermentation by cyanobacteria or  
319 from decaying biomass. Sulfide produced by **D1** was likely re-used by MAGs **G8** and **G4**, the  
320 latter affiliated with *Thioalkalivibrionaceae* (18,57). **G4** expressed *soxX*, *soxC*, *dsrA*, and *fccB*,  
321 suggesting sulfide oxidation through both the *sox* pathway and the reverse *dsr* pathway.  
322 Expression of *sox* and *fcc* was also detected for other unbinned populations, affiliated with  
323 Alphaproteobacteria, Chromatiales, and other Gammaproteobacteria.

324

325 In conclusion, we used metaproteomes and metagenomes to address fundamental questions on  
326 the microbial ecology of soda lake mats. We obtained 91 metagenome assembled genomes and  
327 showed that part of these taxa define a core microbiome, a group of abundant bacteria present  
328 in all samples over space (four lakes) and time (four years). We showed that a very similar  
329 community assembled independently in Central Asian soda lakes. The similarity between some  
330 of the microbial genomes found in these soda lake regions, incredible in the light of their vast  
331 physical separation, suggests that vectors for dispersal are generally ineffective, but can  
332 sometimes distribute abundant community members at the global scale. We also showed both  
333 functional redundancy and existence of complementary niches among cyanobacteria, with  
334 evidence for K and R strategists living side by side. The nature and origin of carbon sources for  
335 photoheterotrophs, including potentially mixotrophic Gemmatimonadetes is an exciting

336 avenue for future research. The presented core microbiome provides a blueprint for design of a  
337 productive and robust microbial ecosystem that could guide effective biotechnology for carbon  
338 dioxide conversion.

339

## 340 **Materials and Methods**

### 341 *Study Site and Sample collection*

342 Samples from benthic microbial mats were collected from four lakes in the Cariboo Plateau  
343 region of British Columbia, Canada in May of 2014, 2015, 2016, and 2017. Microbial mats from  
344 Last Chance Lake, Probe Lake, Deer Lake, and Goodenough Lake were sampled (coordinates in  
345 **Supplementary Table 1**). Mats were immediately frozen, transported on dry ice, and stored at  
346  $-80^{\circ}\text{C}$  within 2 days of sampling. In 2015 and 2017, water samples for aqueous geochemistry  
347 were also taken and stored at  $-80^{\circ}\text{C}$  until analysis.

348

### 349 *Aqueous Geochemistry*

350 Frozen lake water samples were thawed and filtered through a  $0.45\ \mu\text{m}$  nitrocellulose filter  
351 (Millipore Corporation, Burlington, MA) prior to analysis. Carbonate/bicarbonate ( $\text{HCO}_3^-$ )  
352 alkalinity analysis was conducted using an Orion 960 Titrator (Thermo Fisher Scientific,  
353 Waltham, MA), and concentrations were calculated via double differentiation using EZ 960  
354 software. Major cations ( $\text{Ca}^{2+}$ ,  $\text{Mg}^{2+}$ ,  $\text{K}^+$ , and  $\text{Na}^+$ ) were analyzed using a Varian 725-ES  
355 Inductively Coupled Plasma Optical Emission Spectrophotometer (ICP-OES). Major anions ( $\text{Cl}^-$ ,  
356  $\text{NO}_3^-$  and  $\text{SO}_4^{2-}$ ) were analyzed using a Dionex ICS 2000 ion chromatograph (Dionex  
357 Corporation, Sunnyvale, CA), with an Ion Pac AS18 anion column (Dionex Corporation,  
358 Sunnyvale, CA).

359 Water for reduced nitrogen quantification was filtered through a 0.2 µm filter (Pall Life  
360 Sciences, Port Washington, NY). Concentrations were measured using the ortho-  
361 phthaldialdehyde fluorescence assay as previously described (58), with excitation at 410 nm,  
362 and emission at 470 nm.

363

#### 364 *Amplicon sequencing and data processing*

365 DNA extraction and amplicon sequencing were performed as previously described (10), with  
366 primer sets TAREuk454FWD (565f CCAGCASCYGC GGTAATTCC) and TAREukREV3 (964b  
367 ACTTTCGTTCTTGATYRA), targeting Eukaryota, and S-D440 Bact-0341-a-S-17 (b341,  
368 TCGTCGGCAGCGTCAGATGTGTATAAGAGACAGCCTACGGGAGGCAGCAG), and S-D-  
369 Bact-0785-a-A-21 (805R, GTCTCGTGGGCTCGGAGATGTGTATAAGAGACAGGACTA  
370 CHVGGGTATCTAATCC) targeting Bacteria. Sequencing was performed using the MiSeq  
371 Personal Sequencer (Illumina, San Diego, CA) using the 2 x 300 bp MiSeq Reagent Kit v3. The  
372 reads were processed with MetaAmp (59). After merging of paired end reads (>100bp overlap  
373 and <8 mismatches in the overlapping region), primer trimming and quality filtering (<2  
374 mismatches in primer regions and at most 1 expected error), trimming to 350bp, reads were  
375 clustered into operational taxonomic units (OTUs) of >97% sequence identity. Statistics  
376 (ANOSIM, Mantel correlations using conductivity, anion and cation concentrations) and  
377 visualization (non-metric multidimensional scaling, NMDS) were performed in R, using *vegan*  
378 (60). For NMDS, OTUs <1% abundant in all samples were excluded, as were those affiliated  
379 with Metazoa, because of large variations in rRNA copy and cell numbers.

380

#### 381 *Shotgun metagenome sequencing and data processing*

382 Metagenomes of 2015 mat samples were sequenced as described previously (61). Briefly, DNA  
383 was sheared into fragments of ~300 bp using a S2 focused-ultrasonicator (Covaris, Woburn,  
384 MA). Libraries were created using the NEBNext Ultra DNA Library Prep Kit (New England  
385 Biolabs, Ipswich, MA) according to the manufacturer's protocol, which included a size selection  
386 step with SPRIselect magnetic beads (Beckman Coulter, Indianapolis, IN) and PCR enrichment  
387 (8 cycles) with NEBNext Multiplex Oligos for Illumina (New England Biolabs, Ipswich, MA).  
388 DNA concentrations were estimated using qPCR and the Kapa Library Quant Kit (Kapa  
389 Biosystems, Wilmington, MA) for Illumina. 1.8 pM of DNA solution was sequenced on an  
390 Illumina NextSeq 500 sequencer (Illumina, San Diego, CA) using a 300 cycle (2 x 150 bp) high-  
391 output sequencing kit at the Center for Health Genomics and Informatics in the Cumming  
392 School of Medicine, University of Calgary. Raw, paired-end Illumina reads were filtered for  
393 quality as previously described (62). After that, the reads were coverage-normalized with  
394 BBnorm ([sourceforge.net/projects/bbmap](https://sourceforge.net/projects/bbmap)) with "target=100 min=4". Overlapping reads were  
395 merged with BBMerge with default settings. All remaining reads were assembled separately for  
396 each library with MetaSpades version 3.10.0 (63), with default parameters. Contigs of <500 bp  
397 were not further considered. tRNA, ribosomal RNA, CRISPR elements, and protein-coding  
398 genes were predicted and annotated using MetaErg ([sourceforge.net/projects/metaerg/](https://sourceforge.net/projects/metaerg/)). Per-  
399 contig sequencing coverage was estimated and tabulated by read mapping with BBMap, with  
400 default settings and "jgi\_summarize\_bam\_contig\_depths", provided with MetaBat (64). Each  
401 assembly was binned into Metagenome-Assembled-Genomes (MAGs) with MetaBat with  
402 options "-a depth.txt -saveTNF saved\_2500.tnf -saveDistance saved\_2500.dist -v -superspecific  
403 -B 20 --keep". MAG contamination and completeness was estimated with CheckM (65). MAGs  
404 were classified with GTDBtk (version 0.2.2, database release 86) (36), together with MAGs

405 previously obtained from Kulunda soda lakes (30). fastANI was used to compare MAGs across  
406 libraries/assemblies (66). Relative sequence abundances of MAGs were estimated based on  
407 contig sequencing coverage. 16S rRNA gene sequences were obtained with Phyloflash2 (67)  
408 and were associated with MAGs based on phylogeny and sequencing coverage covariance  
409 across samples, and to OTUs based on sequence identity. The RuBisCO phylogenetic tree was  
410 created with MEGA (68). Core genes of MAG variants were identified using blast and these  
411 genes were used to determine the abundances of variants across samples using BMap, with  
412 parameters minratio=0.9 maxindel=3 bwr=0.16 bw=12 fast ambiguous=toss. To identify  
413 diversified core genes, variants were aligned with mafft (69) and only genes with >50 single  
414 nucleotide polymorphisms (SNPs), >1% of positions with a SNP, and with a fraction of non-  
415 synonymous SNPs of >0.825 were kept.

416

#### 417 *Protein Extraction and metaproteomics*

418 Protein was extracted and analyzed from 2014 mat samples, as previously described (61).  
419 Briefly, lysing matrix bead tubes A (MP Biomedicals) containing mat samples and SDT-lysis  
420 buffer (0.1 M DTT) in a 10:1 ratio were bead-beated in an OMNI Bead Ruptor 24 for 45 seconds  
421 at 6 m/s. Next, tubes were incubated at 95°C for 10 minutes, spun down for 5 min at 21,000 g  
422 and tryptic peptides were isolated from pellets by filter-aided sample preparation (FASP) (70).  
423 Peptides were separated on a 50 cm × 75 µm analytical EASY-Spray column using an EASY-  
424 nLC 1000 Liquid Chromatograph (Thermo Fisher Scientific, Waltham, MA) and eluting peptides  
425 were analyzed in a QExactive Plus hybrid quadrupole-Orbitrap mass spectrometer (Thermo  
426 Fisher Scientific). Each sample was run in technical quadruplicates, with one quadruplicate run



427 for 260 minutes with 1  $\mu$ g of peptide loaded, and the other three for 460 minutes each, with 2-4  
428  $\mu$ g of peptide loaded.

429       Expressed proteins were identified and quantified with Proteome Discoverer version  
430 2.0.0.802 (Thermo Fisher Scientific), using the Sequest HT node. The Percolator Node (71) and  
431 FidoCT were used to estimate false discovery rates (FDR) at the peptide and protein level  
432 respectively. Peptides and proteins with DFR >5% were discarded. Likewise, proteins without  
433 protein-unique-peptides, or <2 unique peptides were discarded. Relative protein abundances  
434 were estimated based on normalized spectral abundances (72). The identification database was  
435 created using predicted protein sequences of binned and unbinned contigs, after filtering out  
436 highly similar proteins (>95% amino acid identity) with cd-hit (73), while preferentially keeping  
437 proteins from binned contigs. Sequences of common contaminating proteins were added to the  
438 final database (<http://www.thegpm.org/crap/>), which is available under identifier PXD011230 in  
439 ProteomeXchange. In total, 3,014,494 MS/MS spectra were acquired, yielding 298,187 peptide  
440 spectral matches, and 7,217 identified proteins.

441

#### 442 *Data availability*

443 Amplicon sequences can be found under the Bioproject PRJNA377096. The 16S rRNA sequence  
444 Biosamples are: SAMN06456834, SAMN06456843, SAMN06456852, SAMN06456861,  
445 SAMN09986741-SAMN09986751, and the 18S rRNA sequence Biosamples are: SAMN09991649-  
446 SAMN09991660. The metagenome raw reads and metagenome assembled genomes can also be  
447 found under the Bioproject PRJNA377096. The Biosamples for the metagenome raw reads are  
448 SAMN10093821-SAMN10093824, and the Biosamples for the MAGs are SAMN10237340-

449 SAMN10237430. The metaproteomics data has been deposited to the ProteomeXchange  
450 Consortium via the PRIDE partner repository (74) with the dataset identifier PXD011230.

451

## 452 **Acknowledgements**

453 We thank the University of Calgary's Center for Health Genomics and Informatics for  
454 sequencing and informatics services. We thank Michael Nightingale and Agasteswar  
455 Vadlamani for help with analysis of aqueous geochemistry. We also thank Timber Gillis,  
456 Hayely Todesco, Harsimrit Lakhyan, and Sydney Urschel for help with sample collection and  
457 DNA extractions. We would like to thank Dan Liu and Angela Kouris for help with  
458 metaproteomics sample preparation and analysis. We thank Carmen Li for help with MiSeq  
459 sequencing, and Maryam Ataiean for help with metagenome analysis. This study was  
460 supported by the Natural Sciences and Engineering Research Council (NSERC), Canada  
461 Foundation for Innovation (CFI), Canada First Research Excellence Fund (CFREF), Genome  
462 Canada, Western Economic Diversification, the International Microbiome Center (Calgary),  
463 Alberta Innovates, the Government of Alberta, and the University of Calgary.

464

## 465 **References**

- 466 1. Melack JM, Kilham P. 1974. Photosynthetic rates of phytoplankton in East African  
467 alkaline, saline lakes. *Limnol Oceanogr* 19:743–755.
- 468 2. Talling JF, Wood RB, Prosser M V., Baxter RM. 1973. The upper limit of photosynthetic  
469 productivity by phytoplankton: evidence from Ethiopian soda lakes. *Freshw Biol* 3: 53–76.
- 470 3. Raven JA, Cockell CS, De La Rocha CL. 2008. The evolution of inorganic carbon  
471 concentrating mechanisms in photosynthesis. *Philos Trans R Soc B Biol Sci* 363:2641–2650.

- 472 4. Price GD, Badger MR, Woodger FJ, Long BM. 2008. Advances in understanding the  
473 cyanobacterial CO<sub>2</sub>-concentrating- mechanism (CCM): Functional components, Ci  
474 transporters, diversity, genetic regulation and prospects for engineering into plants. *J Exp*  
475 *Bot.* 59:1441–1461.
- 476 5. Fabry V, Seibel B. 2008 Impacts of ocean acidification on marine fauna and ecosystem  
477 processes. *ICES J Mar Sci* 65:414–432.
- 478 6. Brady AL, Druschel G, Leoni L, Lim DSS, Slater GF. 2013. Isotopic biosignatures in  
479 carbonate-rich, cyanobacteria-dominated microbial mats of the Cariboo Plateau, B.C.  
480 *Geobiology* 11:437–456.
- 481 7. Grant WD. 1990. Alkaliphiles: ecology, diversity and applications. *FEMS Microbiol Rev*  
482 75:255–269.
- 483 8. Canon-Rubio KA, Sharp CE, Bergerson J, Strous M, De la Hoz Siegler H. 2016. Use of  
484 highly alkaline conditions to improve cost-effectiveness of algal biotechnology. *Appl*  
485 *Microbiol Biotechnol* 100: 1611–1622.
- 486 9. Daelman MRJ, Sorokin D, Kruse O, van Loosdrecht MCM, Strous M. 2016. Haloalkaline  
487 bioconversions for methane production from microalgae grown on sunlight. *Trends*  
488 *Biotechnol* 34:450–457.
- 489 10. Sharp CE, Urschel S, Dong X, Brady AL, Slater GF, Strous M. 2017. Robust, high-  
490 productivity phototrophic carbon capture at high pH and alkalinity using natural  
491 microbial communities. *Biotechnol Biofuels* 10: 1–13.
- 492 11. Tutolo BM, Tosca NJ. 2018. Experimental examination of the Mg-silicate-carbonate system  
493 at ambient temperature: Implications for alkaline chemical sedimentation and lacustrine  
494 carbonate formation. *Geochim Cosmochim Acta* 225:80–101.

- 495 12. Grant WD, Sorokin DY. 2011. Distribution and Diversity of Soda Lake Alkaliphiles. In:  
496 Extremophiles Handbook, Tokyo, Springer, Japan, 27–54.
- 497 13. Dadheech PK, Mahmoud H, Kotut K, Krienitz L. 2012. Haloleptolyngbya alcalis gen. et sp.  
498 nov., a new filamentous cyanobacterium from the soda lake Nakuru, Kenya. Hydrobiologia  
499 691:269–283.
- 500 14. Duckworth AW, Grant S, Grant WD, Jones BE, Meijer D. 1998. Dietzia natronolimnaios sp.  
501 nov., a new member of the genus Dietzia isolated from an East African soda lake.  
502 Extremophiles. 2:359–366.
- 503 15. Florenzano G, Sili C, Pelosi E, Vincenzini M. 1985. Cyanospira rippkae and Cyanospira  
504 capsulata (gen. nov. and spp. nov.): new filamentous heterocystous cyanobacteria from  
505 Magadi lake (Kenya). Arch Microbiol 140:301–306.
- 506 16. Sorokin DY, Banciu H, Van Loosdrecht M, Kuenen JG. 2003. Growth physiology and  
507 competitive interaction of obligately chemolithoautotrophic, haloalkaliphilic, sulfur-  
508 oxidizing bacteria from soda lakes. Extremophiles 7:195–203.
- 509 17. Sorokin DY, Lysenko AM, Mityushina LL, Tourova TP, Jones BE, Rainey FA, Robertson LA,  
510 Kuenen JG. 2001. Thioalkalimicrobium aerophilum gen. nov., sp. nov. and  
511 Thioalkalimicrobium sibericum sp. nov., and Thioalkalivibrio versutus gen. nov., sp. nov.,  
512 Thioalkalivibrio nitratis sp. nov., novel and Thioalkalivibrio denitrificans sp. nov., novel  
513 obligately alkaliphilic and obligately chemolithoautotrophic sulfur-oxidizing bacteria from  
514 soda lakes. Int J Syst Evol Microbiol 51:565–580.
- 515 18. Sorokin DY, Kuenen JG. 2005. Haloalkaliphilic sulfur-oxidizing bacteria in soda lakes.  
516 FEMS Microbiol Rev 29:685–702.

- 517 19. Foti M, Sorokin DY, Lomans B, Mussman M, Zacharova EE, Pimenov NV, Kuenen JG,  
518     Muyzer G. 2007. Diversity, activity, and abundance of sulfate-reducing bacteria in saline  
519     and hypersaline soda lakes. *Appl Environ Microbiol* 73:2093–2100.
- 520 20. Pikuta EV, Hoover RB, Bej AK, Marsic D, Whitman WB, Cleland D, Krader P. 2003.  
521     *Desulfonatronum thiodismutans* sp. nov., a novel alkaliphilic, sulfate-reducing bacterium  
522     capable of lithoautotrophic growth. *Int J Syst Evol Microbiol* 53: 1327–1332.
- 523 21. Sorokin D, Tourova T, Schmid MC, Wagner M, Koops HP, Kuenen GJ, Jetten MSM. 2001.  
524     Isolation and properties of obligately chemolithoautotrophic and extremely alkali-tolerant  
525     ammonia-oxidizing bacteria from Mongolian soda lakes. *Arch Microbiol* 176:170–177.
- 526 22. Sorokin DY, Vejmekova D, Luecker S, Streshinskaya GM, Rijpstra WIC, Sinninghe Damste  
527     JS, Kleerebezem R, Van Loosdrecht MCM, Muzyer G, Daims H. 2014. *Nitrolancea*  
528     *hollandica* gen. nov., sp. nov., a chemolithoautotrophic nitrite-oxidizing bacterium isolated  
529     from a bioreactor belonging to the phylum Chloroflexi. *Int J Sys Evol Microbiol* 64:1859-  
530     1865.
- 531 23. Shapovalova AA, Khijniak T V, Tourova TP, Muyzer G, Sorokin DY. 2008. Heterotrophic  
532     denitrification at extremely high salt and pH by haloalkaliphilic Gammaproteobacteria  
533     from hypersaline soda lakes. *Extremophiles* 12:619–625.
- 534 24. Sorokin DY, Van Pelt S, Tourova TP, Evtushenko LI. 2009. *Nitriliruptor alkaliphilus* gen.  
535     nov., sp. nov., a deep-lineage haloalkaliphilic actinobacterium from soda lakes capable of  
536     growth on aliphatic nitriles, and proposal of *Nitriliruptoraceae* fam. nov. and  
537     *Nitriliruptorales* ord. Nov. *Int J Sys Evol Microbiol* 59:248-253.
- 538 25. Sorokin DY, Muntyan MS, Toshchakov SV, Korzhenkov A, Kublanov IV. 2018. Phenotypic  
539     and Genomic Properties of a Novel Deep-Lineage Haloalkaliphilic Member of the Phylum

- 540 Balneolaeota From Soda Lakes Possessing Na<sup>+</sup>-Translocating Proteorhodopsin. *Frontiers*  
541 *Microbiol* 9:2672.
- 542 26. Lin J-L, Radajewski S, Eshinimaev BT, Trotsenko YA, McDonald IR, Murrell JC. 2004.  
543 Molecular diversity of methanotrophs in Transbaikal soda lake sediments and  
544 identification of potentially active populations by stable isotope probing. *Environ*  
545 *Microbiol* 6:1049–1060.
- 546 27. Kevbrin VV, Zhilina TN, Rainey FA, Zavarzin GA. 1998. *Tindallia magadii* gen. nov., sp.  
547 nov.: An alkaliphilic anaerobic ammonifier from soda lake deposits. *Curr Microbiol* 37:94–  
548 100.
- 549 28. Sorokin DY, Abbas B, Geleijnse M, Kolganova TV, Kleerebezem R, van Loosdrecht MCM.  
550 2016. Syntrophic associations from hypersaline soda lakes converting organic acids and  
551 alcohols to methane at extremely haloalkaline conditions. *Environ Microbiol* 18:3189–202.
- 552 29. Sorokin DY, Abbas B, Geleijnse M, Pimenov NV, Sukhacheva MV, van Loosdrecht MCM.  
553 2015. Methanogenesis at extremely haloalkaline conditions in the soda lakes of Kulunda  
554 Steppe (Altai, Russia). *FEMS Microbiol Ecol* 91:1–11.
- 555 30. Vavourakis CD, Andrei AS, Mehrshad M, Ghai R, Sorokin DY, Muyzer G. 2018. A  
556 Metagenomics Roadmap to the Uncultured Genome Diversity in Hypersaline Soda Lake  
557 Sediments. *Microbiome* 6:1–18.
- 558 31. Hammer UT. 1986. *Saline lake ecosystems of the world*. 1st ed. Springer, The Netherlands.
- 559 32. Renaut RW. 1990. Recent carbonate sedimentation and brine evolution in the saline lake  
560 basins of the Cariboo Plateau, British Columbia, Canada. *Hydrobiologia* 197:67–81.
- 561 33. Renaut RW, Long PR. 1989. Sedimentology of the saline lakes of the Cariboo Plateau,  
562 Interior British Columbia, Canada. *Sediment Geol* 64:239–264.

- 563 34. Wilson SE, Cumming BF, Smol JP. 1994. Diatom-salinity relationships in 111 lakes from  
564 the Interior Plateau of British Columbia, Canada: the development of diatom-based models  
565 for paleosalinity reconstructions. *J Paleolimnol* 12:197–221.
- 566 35. Bos D, Cumming BF, Watters CE, Smol JP. 1996. The Relationship between Zooplankton,  
567 Conductivity And lake-Water Ionic Composition in 111 Lakes from the Interior Plateau of  
568 British Columbia, Canada. *Int J Salt Lake Res* 5:1–15.
- 569 36. Parks DH, Chuvochina M, Waite DW, Rinke C, Skarszewski A, Chaumeil PA, Hugenholtz  
570 P. 2018. A Standardized Bacterial Taxonomy Based on Genome Phylogeny Substantially  
571 Revises the Tree of Life. *Nature Biotechnol* 36:996-1004.
- 572 37. Valverde A, Tuffin M, Cowan D. 2012. Biogeography of bacterial communities in hot  
573 springs: a focus on the actinobacteria. *Extremophiles* 6:669-679.
- 574 38. Stal L. 1995. Physiological ecology of cyanobacteria in microbial mats and other  
575 communities. *New Phytol* 131:1–32.
- 576 39. Hinzke T, Kouris A, Hughes RA, Strous M, Kleiner M. 2019. More Is Not Always Better:  
577 Evaluation of 1D and 2D-LC-MS/MS Methods for Metaproteomics. *Frontiers Microbiol*  
578 10:1–13.
- 579 40. Bagnoud A, Chourey K, Hettich RL, de Bruijn I, Andersson AF, Leupin OX, Schwyn B,  
580 Bernier-Latmani R. 2016. Reconstructing a hydrogen-driven microbial metabolic network  
581 in Opalinus Clay rock. *Nat Commun* 7:1–10.
- 582 41. Aryal UK, Stöckel J, Krovvidi RK, Gritsenko MA, Monroe ME, Moore RJ, Koppenaar DW,  
583 Smith RD, Pakrasi HB, Jacobs JM. 2011. Dynamic Proteomic Profiling of a Unicellular  
584 Cyanobacterium *Cyanothece* ATCC51142 across Light-Dark Diurnal Cycles. *BMC Systems*  
585 *Biology* 5:194.

- 586 42. Matallana-Surget S, Derock J, Leroy B, Badri H, Deschoenmaecker F, Wattiez R. 2014.  
587 Proteome-Wide Analysis and Diel Proteomic Profiling of the Cyanobacterium *Arthrospira*  
588 *Platensis* PCC 8005. PLoS ONE 9:e99076.
- 589 43. Allison SD, Martiny JBH. 2008. Resistance, Resilience, and Redundancy in Microbial  
590 Communities. Proc Natl Acad Sci USA 105:11512–11519.
- 591 44. Shade A, Peter H, Allison SD, Baho DL, Berga M, Bürgmann H, Huber DH, Langenheder S,  
592 Lennon JT, Martiny JBH, Matulich KL, Schmidt TM, Handelsman J. 2012. Fundamentals of  
593 Microbial Community Resistance and Resilience. Frontiers Microbiol 3:417.
- 594 45. Ting CS, Rocap G, King J, Chisholm SW. 2002. Cyanobacterial Photosynthesis in the  
595 Oceans: The Origins and Significance of Divergent Light-Harvesting Strategies. Tr  
596 Microbiol 10:134–42.
- 597 46. Croce R, Van Amerongen H. 2014. Natural Strategies for Photosynthetic Light Harvesting.  
598 Nature Chem Biol 10:492–501.
- 599 47. Markager S, Vincent W. 2000. Of UV and Blue Light in Natural Spectral Light Attenuation  
600 and the Absorption Waters. Limnol Oceanograph 45:642–650.
- 601 48. Pearson A. 2010. Pathways of Carbon Assimilation and Their Impact on Organic Matter  
602 Values  $\delta^{13}\text{C}$ . In: Timmis KN (eds) Handbook of Hydrocarbon and Lipid Microbiology.  
603 Springer, Berlin, Heidelberg.
- 604 49. Melack JM, Kilham P, Fisher TR. 1982. Responses of Phytoplankton to Experimental  
605 Fertilization with Ammonium and Phosphate in an African Soda Lake. Oecologia 52:321–  
606 326.



- 607 50. Harper CJ, Hayward D, Kidd M, Wiid I, van Helden P. 2010. Glutamate dehydrogenase and  
608 glutamine synthetase are regulated in response to nitrogen availability in *Mycobacterium*  
609 *smegmatis*. *BMC Microbiol* 10:138.
- 610 51. Li T, Piltz B, Podola B, Dron A, de Beer D, Melkonian M. 2016. Microscale Profiling of  
611 Photosynthesis-Related Variables in a Highly Productive Biofilm Photobioreactor.  
612 *Biotechnol Bioeng* 113:1046–55.
- 613 52. Wilson DF, Swinnerton JW, Lamontagne RA. 1970. The Ocean: A Natural Source of Carbon  
614 Monoxide. *Science* 167:984–86.
- 615 53. Zeng Y, Feng F, Medova H, Dean J, Koblížek M. 2014. Functional type 2 photosynthetic  
616 reaction centers found in the rare bacterial phylum Gemmatimonadetes. *Proc Natl Acad*  
617 *Sci* 111:7795–7800.
- 618 54. Zeng Y, Baumbach J, Barbosa EGV, Azevedo V, Zhang C, Koblížek M. 2016. Metagenomic  
619 evidence for the presence of phototrophic Gemmatimonadetes bacteria in diverse  
620 environments. *Environ Microbiol Rep* 8:139–149.
- 621 55. Scott KM, Sievert SM, Abril FN, Ball LA, Barrett CJ, Blake RA, Boller AJ, Chain PSG, Clark  
622 JA, Ravis CR, Detter C, Do KF, Dobrinski KP, Faza BI, Fitzpatrick KA, Freyermuth SK,  
623 Harmer TL, Hauser LJ, Huegler M, Kerfield CA, Klotz MG, Kong WW, Land M, Lapidus A,  
624 Larimer FW, Longo DL, Lucas S, Malfatti SA, Massey SE, Martin DD, McCuddin Z, Meyer  
625 F, Moore JL, Ocampo Jr LH, Paul JH, Paulsen IT, Reep DK, Ren Q, Ross RL, Sato PY,  
626 Thomas P, Tinkham LE, Zeruth GT. 2006. The Genome of Deep-Sea Vent  
627 Chemolithoautotroph *Thiomicrospira crunogena* XCL-2. *PLOS Biol* 4:e383.
- 628 56. Sorokin DY, Kuenen JG, Muyzer G. 2011. The microbial sulfur cycle at extremely  
629 haloalkaline conditions of soda lakes. *Front Microbiol* 2:44.

- 630 57. Ahn AC, Meier-Kolthoff JP, Overmars L, Richter M, Woyke T, Sorokin DY, Muyzer G. 2017.  
631 Genomic Diversity within the Haloalkaliphilic Genus Thioalkalivibrio. PLoS ONE 12: 1–23.
- 632 58. Holmes RM, Aminot A, K erouel R, Hooker BA, Peterson BJ. 1999. A Simple and Precise  
633 Method for Measuring Ammonium in Marine and Freshwater Ecosystems. Can J Fisheries  
634 Aq Sci 56:1801–1808.
- 635 59. Dong X, Kleiner M, Sharp CE, Thorson E, Li C, Liu D, Strous M. 2017. Fast and Simple  
636 Analysis of MiSeq Amplicon Sequencing Data with MetaAmp. Frontiers Microbiol 8:1461.
- 637 60. Dixon P. 2003. VEGAN, a Package of R Functions for Community Ecology. J Vegetation Sci  
638 14:927–930.
- 639 61. Kleiner M, Thorson E, Sharp CE, Dong X, Liu D, Li C, Strous M. 2017. Assessing Species  
640 Biomass Contributions in Microbial Communities via Metaproteomics. Nature Comm  
641 8:1558.
- 642 62. Saidi-Mehrabad A, He Z, Tamas I, Sharp CE, Brady AL, Rochman FF, Bodrossy L, Abell  
643 GCJ, Penner T, Dong X, Sensen CW, Dunfield PF. 2013. Methanotrophic Bacteria in  
644 Oilsands Tailings Ponds of Northern Alberta. ISME J 7:908–921.
- 645 63. Nurk S, Meleshko D, Korobeynikov A, Pevzner PA. 2017. MetaSPAdes: A New Versatile  
646 Metagenomic Assembler. Genome Res 27:824–834.
- 647 64. Kang DD, Froula J, Egan R, Wang Z. 2015. MetaBAT, an Efficient Tool for Accurately  
648 Reconstructing Single Genomes from Complex Microbial Communities. PeerJ 3:e1165.
- 649 65. Parks DH, Imelfort M, Skennerton CT, Hugenholtz P, Tyson GW. 2015. CheckM: Assessing  
650 the Quality of Microbial Genomes Recovered from Isolates, Single Cells, and  
651 Metagenomes. Genome Res 25:1043–1055.

- 652 66. Jain C, Rodriguez-R LM, Phillippy AM, Konstantinidis KT, Aluru S. 2018. High throughput  
653 ANI analysis of 90K prokaryotic genomes reveals clear species boundaries. *Nature Comm*  
654 9:5114.
- 655 67. Gruber-Vodicka HR, Seah BKB, Pruesse E. 2019. phyloFlash — Rapid SSU rRNA profiling  
656 and targeted assembly from metagenomes. *bioRxiv* 521922; doi:  
657 <https://doi.org/10.1101/521922>.
- 658 68. Hall BG. 2013. Building phylogenetic trees from molecular data with MEGA. *Mol Biol Evol*  
659 30: 1229–1235.
- 660 69. Katoh K, Standley DM. 2013. MAFFT Multiple Sequence Alignment Software Version 7:  
661 Improvements in Performance and Usability. *Mol Biol Evol* 30:772–780.
- 662 70. Wisniewski JR, Zougman A, Nagaraj N, Mann M. 2009. Universal Sample Preparation  
663 Method for Proteome Analysis. *Nature Meth.* 6:359–362.
- 664 71. Spivak M, Weston J, Bottou L, Käll L, Stafford W. 2009. Improvements to the Percolator  
665 Algorithm for Peptide Identification from Shotgun Proteomics Data Sets. *J Proteome Res*  
666 8:3737–3745.
- 667 72. Zybaylov B Mosley AL, Sardiú ME, Coleman MK, Florens L, Washburn MP. 2006. Statistical  
668 Analysis of Membrane Proteome Expression Changes in *Saccharomyces Cerevisiae*. *J*  
669 *Proteome Res* 5:2339–47.
- 670 73. Li W, Godzik A. 2006. Cd-Hit: A Fast Program for Clustering and Comparing Large Sets of  
671 Protein or Nucleotide Sequences. *Bioinformatics* 22:1658–1659.
- 672 74. Vizcaíno JA, Csordas A, del-Toro N, Dianes JA, Griss J, Lavidas I, Mayer G, Perez-Riverol Y,  
673 Reisinger F, Ternent T, Xu Q-W, Wang R, Hermjakob H. 2016. 2016 Update of the PRIDE  
674 Database and Its Related Tools. *Nucl Acids Res* 44:D447–56.

## 675 **Figure legends**

676 **Figure 1** – Satellite images of **A** Deer Lake, **B** Goodenough and Last Chance Lakes, **C** Probe  
677 Lake. **D**. Bubble plots showing the relative contribution of Cyanobacteria and Eukaryotes to  
678 the lake metaproteomes. **E**. Non-metric multidimensional scaling (NMDS) plots using Bray-  
679 Curtis dissimilarity to visualize the microbial communities of the soda lake mats over years of  
680 sampling using 16S rRNA amplicon sequencing data, and **F** 18S rRNA amplicon sequencing  
681 data. Shapes indicate year of sampling: Circles: 2014, square: 2015, diamond: 2016, triangle:  
682 2017. Samples for 18S rRNA analysis were not taken in 2016, and Deer Lake samples were not  
683 taken in 2014 for 18S, and +2016 for 16S. NMDS Stress values were below 0.11.

684

685 **Figure 2** – **a**. Sunburst diagram showing relative abundances and GTDB taxonomic  
686 classifications of metagenome-assembled-genomes (MAGs) obtained from Cariboo lakes. Core-  
687 microbiome MAGs with closest relatives among Central Asian (Kulunda) soda lake MAGs are  
688 shown in grey. Red outlines indicate new clades that were not yet represented in GTDB. For  
689 example, MAG C1, the most abundant MAG, is affiliated with the genus *Nodosilinea*, which was  
690 represented in GTDB, with a Kulunda MAG more similar than any genome present in GTDB.

691 **b**. Scatter plot showing for each core microbiota the genetic distance between Cariboo and  
692 Kulunda representatives as a function of the abundance in Cariboo mat samples. This  
693 relationship is statistically significant (Pearson's correlation  $r: -0.49$ ,  $p < 0.05$ ), but no such  
694 relationship was detected for the abundance of Kulunda MAGs. See also **Supplementary**

695 **Table 3**.

696

697 **Figure 3** – Heatmap showing abundances and expressed functions for metagenome-assembled  
698 genomes (MAGs) with at least 15 proteins identified in the metaproteomes. MAGs are broadly  
699 arranged based on function, with photoautotrophs in green, anoxygenic phototrophs in yellow,  
700 sulfur cycling in orange, and other heterotrophic bacteria in brown. Metabolic potential was  
701 inferred from the genes listed in **Supplementary Table 7**. If the gene was identified in a  
702 metaproteome it was considered “expressed”, and is shaded according to its highest relative  
703 abundance (% of all peptide spectral matches) in the four lake metaproteomes.

704

705 **Figure 4** – Voronoi diagrams comparing expression levels of functions by MAGs **C1** and **C5**,  
706 both associated with filamentous cyanobacteria. The area of for each function is proportional  
707 to the percent that protein or subsystem accounts for out of the MAG’s expressed proteins. Size  
708 of the bubble in the bubble plot is normalized against the relative abundances of ribosomal  
709 proteins, translation factors, and protein chaperones in the MAG’s proteome. See also  
710 **Supplementary Table 7**.

711

712 **Figure 5** – **a.** Phylogenetic tree of MAGs affiliated with Gemmatimonadota obtained from  
713 Cariboo lakes (blue, Ge1-5) and Kulunda lakes (orange). The tree was created with GTDBtk,  
714 based on concatenated conserved single copy genes, using fasttree2. **b.** Phylogenetic tree of the  
715 RuBisCO Form 1 encoded on MAGs in one of the Gemmatimonadota clades. Congruence  
716 between the trees indicates vertical inheritance after a single horizontal gene transfer event  
717 from Alphaproteobacteria.

**718 Supplementary Tables available as 10.6084/m9.figshare.7991171**

719

720 Table 1 – Aqueous Geochemistry of the four lakes.

721 Table 2 – Operational Taxonomic Units, Bacterial 16S and 18S.

722 Table 3 – Metagenome Assembled Genomes (MAGs) – GTDB classification, abundances,  
723 quality, relationships to Kulunda MAGs.

724 Table 4 – Full length 16S rRNA gene sequences associated with MAGs.

725 Table 5 – Co-occurrences of nearly identical variants of MAGs, showing no evidence for  
726 competitive exclusion.

727 Table 6 – Evidence for diversifying evolution among some core genes of sets of MAG variants.

728 Table 7 – Expression data for signature genes of different metabolic pathways (Figure 4).
